# Supplementary material for: Biscuits with No Added Sugar Containing Stevia, Coffee Fibre and Fructooligosaccharides Modifies α-Glucosidase Activity and the Release of GLP-1 from HuTu-80 Cells and Serotonin from Caco-2 Cells after In Vitro Digestion
Source: MDPI journal article supplement (doi:10.3390/nu9070694), 2017-07-04
Supplement: s1 [file s1]

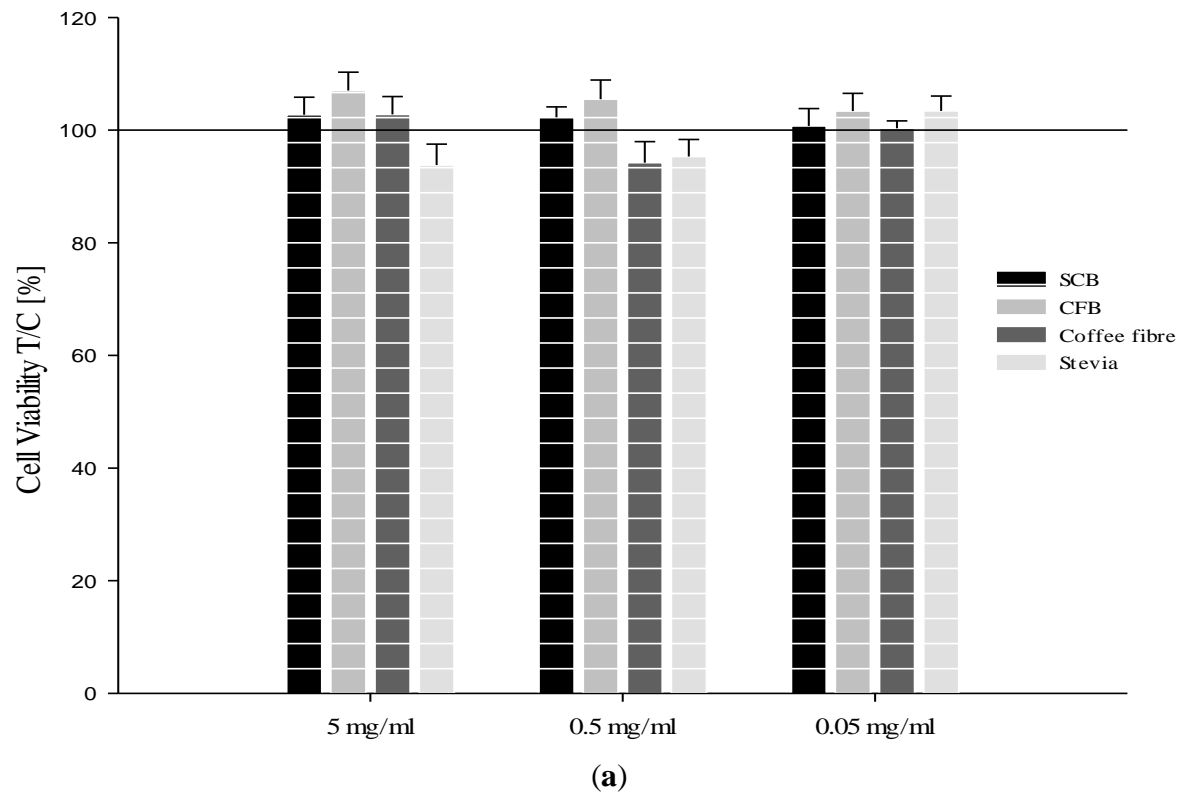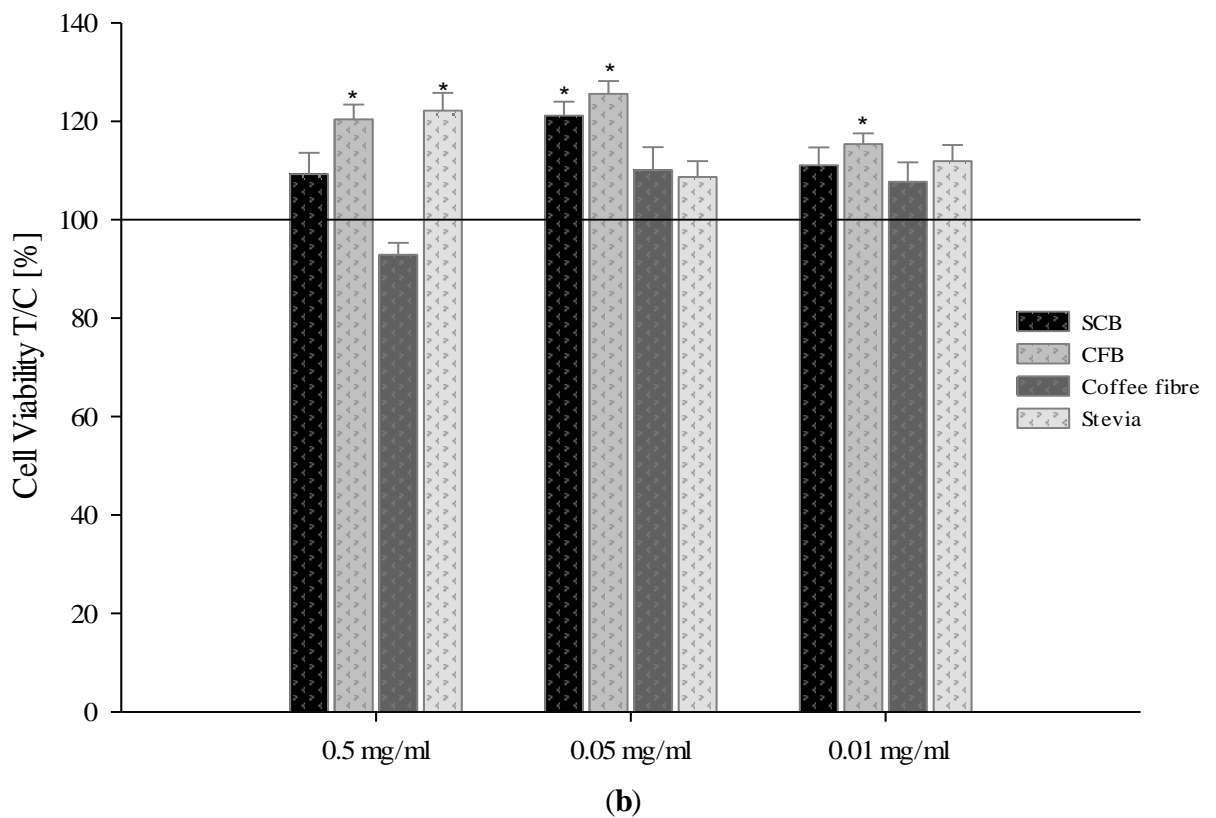

**Figure S1.** Cytotoxic effects of soluble fractions recovered from the digested sucrose-containing biscuit (SCB), coffee fibre-containing biscuit (CFB) and antioxidant coffee fibre that contain bioaccessible compounds; as well as, stevia, on (a) Caco-2 cells at concentrations of 5, 0.5 and 0.05 mg/ml, and on (b) HuTu-80 cells at 0.5, 0.05 and 0.01 mg/ml, compared to control (cells with media, 100% viability). All measurements were expressed as mean  $\pm$  SEM (n=3, tr=6). Significant differences vs. control were determined by One-Way ANOVA followed by Dunn's posthoc test ( $p < 0.05$ ) and marked as '\*'.
